# Supplementary material for: Statin-activated nuclear receptor PXR promotes SGK2 dephosphorylation by scaffolding PP2C to induce hepatic gluconeogenesis
Source: PubMed Central journal article supplement (PMC4585725; doi:10.1038/srep14076), 2015-09-22

## **Supplementary information**

Statin-activated nuclear receptor PXR promotes SGK2 dephosphorylation by scaffolding

PP2C to induce hepatic gluconeogenesis

Saki Gotoh and Masahiko Negishi

**Supplementary Figure 1. Statin induction of the *G6Pase* gene mediated by SGK2 and**

**PXR.** (A) Relative expression of G6Pase mRNA levels measured by qRT-PCR in SGK2

siRNA (left) or PXR siRNA (right)-transfected human primary hepatocytes treated with

simvastatin (Simva, 10  $\mu$ M) for 24 h. Results are shown as fold change relative to DMSO

treated control siRNA transfected cells. (n = 3, mean  $\pm$  s.d.) \*P < 0.05, \*\*\*P < 0.001. NS,

not significant, determined by One-way ANOVA. (B) Relative expression of G6Pase

mRNA levels measured by qRT-PCR in SGK2 siRNA (left) or PXR siRNA

(right)-transfected ShP51 cells treated with simvastatin (Simva, 10  $\mu$ M) for 2.5 and 5 h.

Results are shown as fold change relative to DMSO treated control siRNA transfected cells.

(n = 3, mean  $\pm$  s.d.) \*\*P < 0.01, \*\*\*P < 0.001. NS, not significant, determined by One-way

ANOVA.

**Supplementary Figure 2. Effect of phosphatase inhibitors on simvastatin induction**

**of gluconeogenic genes.** Relative expression of PEPCK1 (left) and G6Pase (right) mRNA

levels measured by qRT-PCR in ShP51 cells which are pre-treated with (A) sanguinarine

chloride (3  $\mu$ M), (B) okadaic acid (10 nM) or (C) tautomycin (20 nM) and fostriecin (100

nM) for 30 min, followed by co-treatment with simvastatin (Simva, 10  $\mu$ M) for additional 3

h. Results are shown as fold change relative to DMSO treated cells. (n = 3, mean  $\pm$  s.d.)

\*\*P < 0.01, \*\*\*P < 0.001. NS, not significant, determined by One-way ANOVA. (D)

Immunoprecipitation of FLAG-SGK2 and Western blot analysis of PP2C $\alpha$ , PP1 $\alpha$ , PP2A and FLAG-SGK2 in pcDNA/FLAG/SGK2 T193A or pcDNA/FLAG/SGK2

T193D-transfected ShP51 cells treated with simvastatin (Simva, 10  $\mu$ M) for 60 min.

**Supplementary Figure 3. SGK2 binding sites at 107/141 and 334/348 of PXR.** Top,

immunoprecipitation of FLAG-PXR WT and FLAG- PXR  $\Delta$ 107/141,  $\Delta$ 334/348 and

Western blot analysis of SGK2, PP2C $\alpha$  and FLAG-PXR in pcDNA/SGK2 and

pCR3/FLAG/PXR or pCR3/FLAG/PXR  $\Delta$ 107/141,  $\Delta$ 334/348 transfected HepG2 cells

treated with simvastatin (Simva, 10  $\mu$ M) for 60 min. Bottom, schematic representation of

domain structure of human PXR WT and PXR  $\Delta$ 107/141,  $\Delta$ 334/348. DBD: DNA binding

domain, LBD: ligand binding domain.

**Supplementary Figure 4. Scheme of identification of PSRE within the upstream**

**region of gluconeogenic genes.** 10 K upstream region of human *G6Pase* gene was

searched for PXR binding sequences analyzed by GCG Seqlab. 27 putative binding sites

were aligned with 10 K upstream region of human *PEPCK1* gene, resulting in 5 putative sites found. ChIP assays were subjected to examine PXR levels at regions A (-8,460/-8,033), B (-7,146/-6,824), C (-5,083/-4,633) and D (-1,759/-1,590, PSRE) of the human *G6Pase* promoter in ShP51 cells treated with rifampicin (10  $\mu$ M) for 1 h.

**Supplementary Figure 5. Statin-treatment increase the human *PEPCK1* IRS promoter in ShP51 cells.** Luciferase activity of human *PEPCK1* promoter in ShP51 cells exposed to simvastatin (Simva, 10  $\mu$ M) for 24 h. Results are shown as fold change relative to DMSO treated cells (n = 3, mean  $\pm$  s.d). \*\*P < 0.01, determined by Student's t test.

**Supplementary Figure 6. Statin-treatment did not affect phosphorylated status of SGK2 in mouse livers.** Left, relative expression of *PEPCK1* mRNA levels measured by qRT-PCR in livers of simvastatin (50 mg/kg)-administrated mice. Results are shown as fold change relative to control mouse livers (n = 3, mean  $\pm$  s.e.) NS, not significant, determined by Student's t test. Right, Western blot analysis of p-SGK2, SGK2 and  $\beta$ -actin from whole cell lysates from livers of simvastatin (50 mg/kg)-administrated mice.

**Supplementary Table 1** Primer sequences used for plasmid constructions

---

|                        | <b>Primer Sequences (5'-3')</b>                                            |
|------------------------|----------------------------------------------------------------------------|
| hSGK2 full length      | ACCATGAACTCTAGCCCAGCTGGGACCC;<br>CTAGCAATCCAAGATGTCATCATCCTCTGG            |
| Mutation of SGK2 T93A  | TGAAGACACCACATCCGCATTCTGTGGTACCCC;<br>GGTACCACAGAATGCGGATGTGGTGTCTTCA      |
| Mutation of SGK2 T193D | TGAAGACACCACATCCGACTTCTGTGGTACCCC;<br>GGGGTACCACAGAAGTCGGATGTGGTGTCTTCA    |
| FLAG-SGK2              | AACCCAGAATTCAATGAACTCTAGCCCAGCTGGGA;<br>CGTGCTGGATCCCTAGCAATCCAAGATGTCATCA |
| PXR $\Delta$ 107/141   | CGCAAGTGCCTGGAGAGCGGCATGGGGCTGAC;<br>CATCCGCTGCTCCTCTGTCAGCCCCATGCCGC      |
| PXR $\Delta$ 334/348   | TTCCACTACATGCTGAAGAAGCTGGAGGAGGA;<br>CTGCAGCTGGTCCACCACGCGGTGATGCAGCT      |

---

**Supplementary Table 2** Primer sequences used for ChIP assays

---

|                 | <b>Primer Sequences (5'-3')</b>                      |
|-----------------|------------------------------------------------------|
| PEPCK1 PSRE     | TGACACCTGAGAGGTGGCCCT; TGCAGGAGGGGGCCAGACAG          |
| PEPCK1 IRS      | CCCAAGTTAGGGTGCATCCTTCCCA;<br>ACAGGCAGGTGGGTCAAGGACA |
| G6Pase A        | AGGCCGAGGCGGGTAGATCG; TTACAGGCACGCGCCACCAC           |
| G6Pase B        | CCTCTGCCTCTGTAGTGCGCC; CCTGCCTCAGCCTCCCGAGT          |
| G6Pase C        | CCCAGCAGGAGTGCAGTGGC; GTGCAGTGGCTCACGCCTGT           |
| G6Pase D (PSRE) | AGACCAGCCTGGGCCGCATA; ACACTTGGGTCACGGAGGACTGT        |
| G6Pase IRS      | TGTCCTGTGTCTCTGGCCTGGT; TCAGGTCAACCCAGCCCTGATCT      |

---

**Supplementary Table 3** Consensus PXR binding site and PSRE sequences

---

**PSRE Sequences (5'-3')**

---

|                            |                                                      |
|----------------------------|------------------------------------------------------|
| Consensus PXR binding site | TGTACTCCGTGACCC                                      |
| G6Pase PSRE                | AGTCCTCCGTGACCC                                      |
| PEPCK1 PSRE                | GGGTCTGCCATGACT (Complementary sequence is similar.) |

---

# Supplemental Figure 1

a

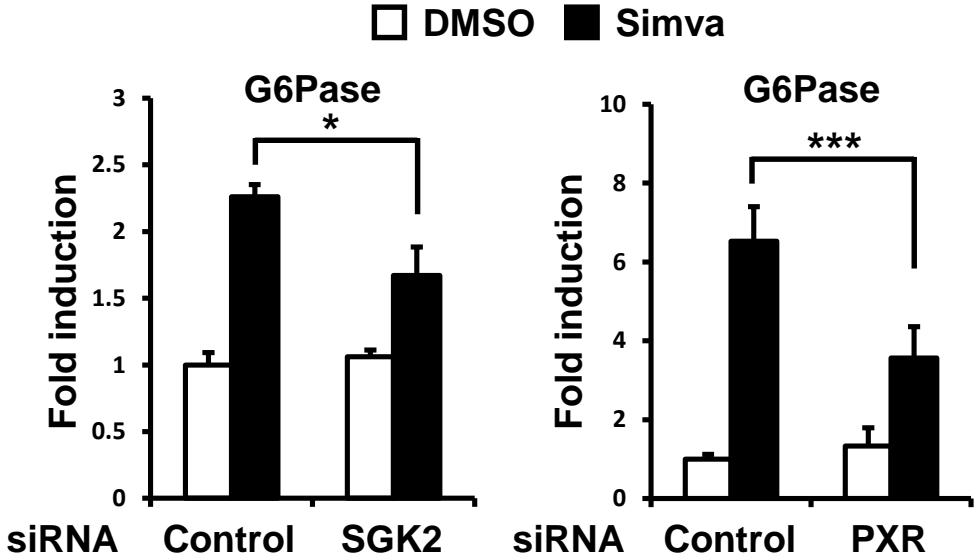

b

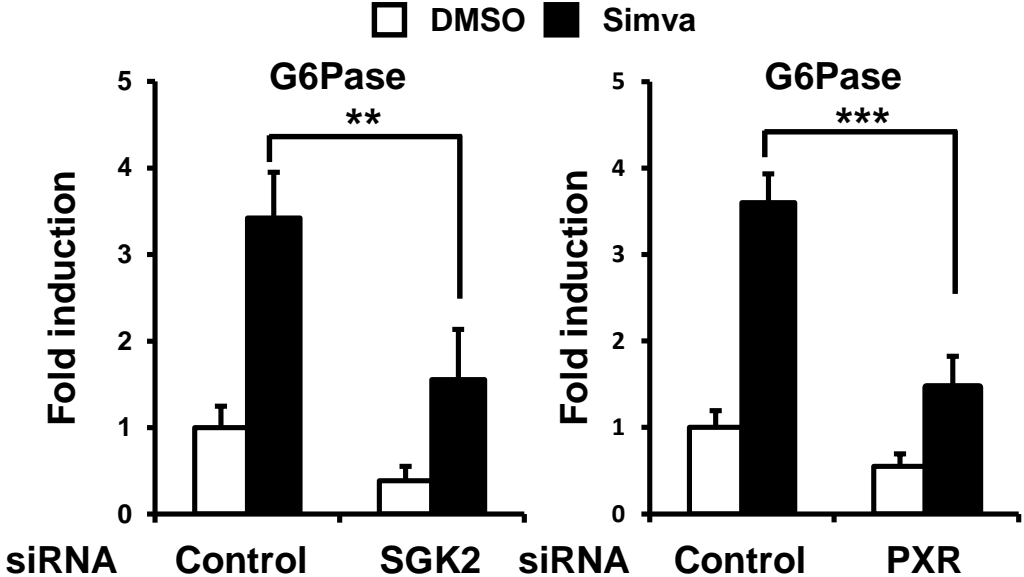



## Supplemental Figure 2

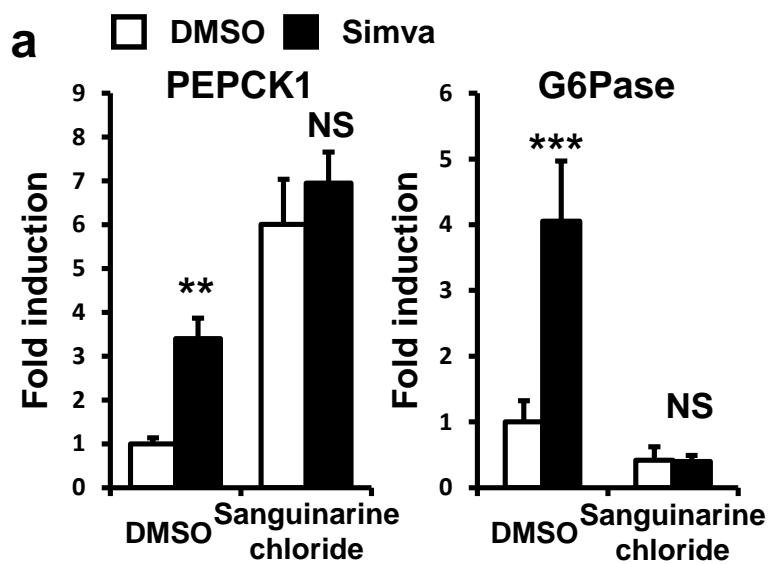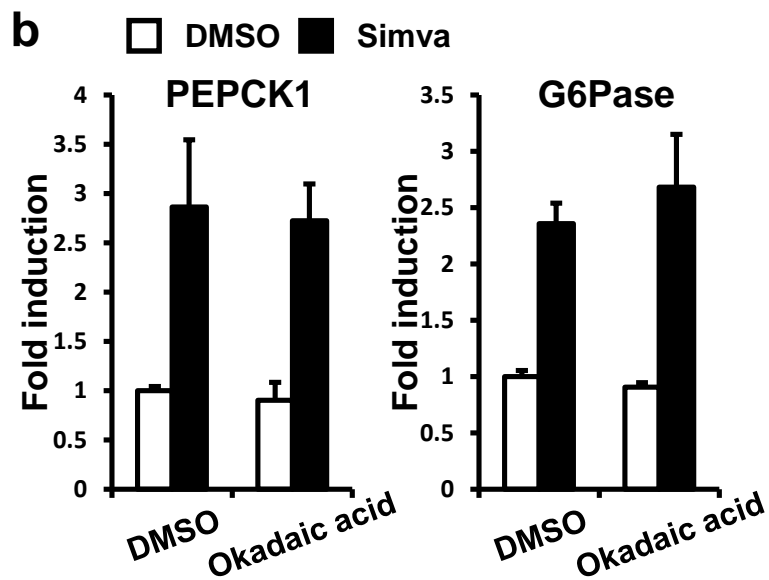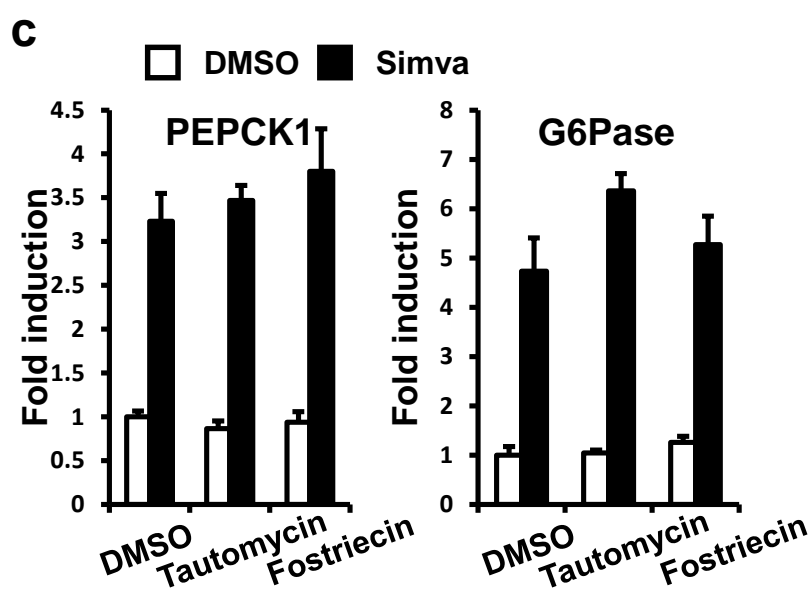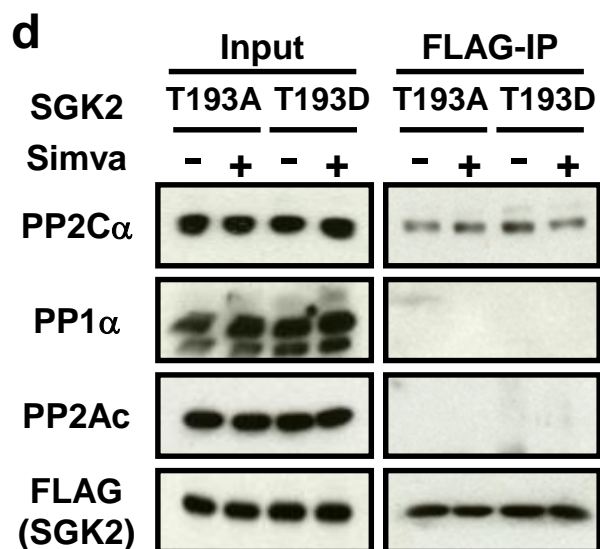

# Supplemental Figure 3

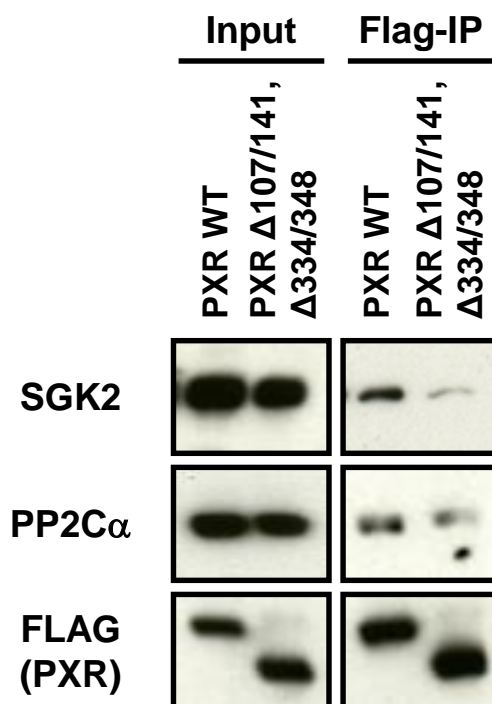

PXR WT

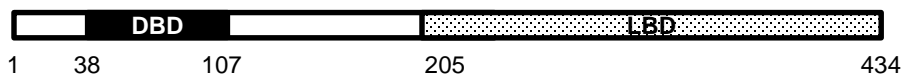

PXR  $\Delta$ 107/141,  $\Delta$ 334/348

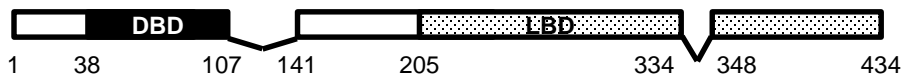



# Supplemental Figure 5

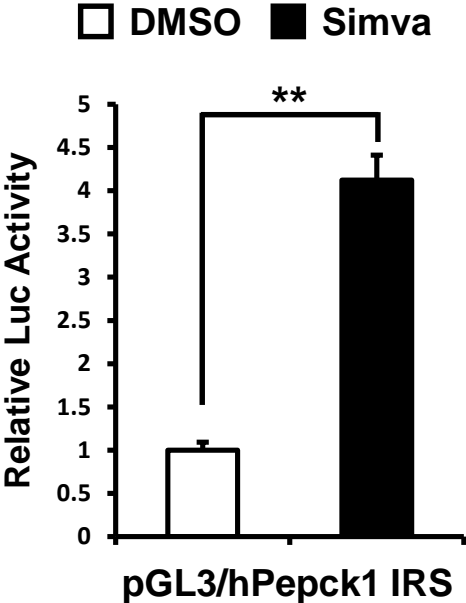

# Supplemental Figure 6

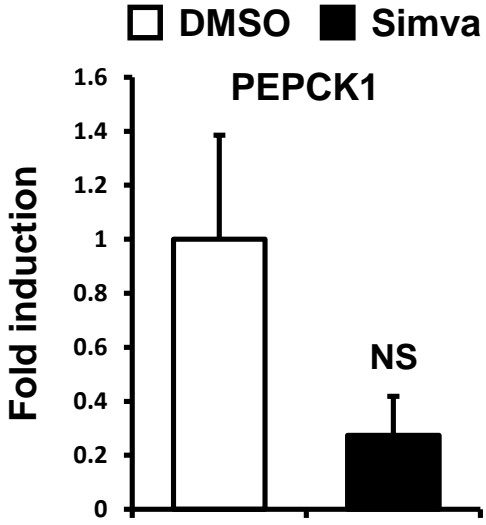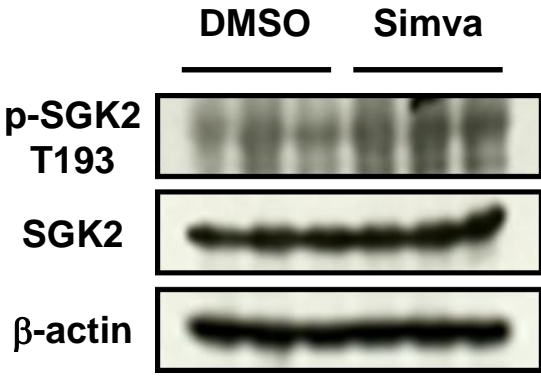

Supplement: srep14076-s1.pdf [file srep14076-s1.pdf]
